# Supplementary material
Source: PubMed Central journal article supplement (PMC6311716)

Pre-surgery

Post-surgery

WT

Prox1<sup>+/-</sup>

WT

Prox1<sup>+/-</sup>

Ipsilateral hindlimb skin

CD45 LYVE-1 DAPI

50  $\mu$ m

CD4 LYVE-1 DAPI

50  $\mu$ m

F4/80 LYVE-1 DAPI

50  $\mu$ m

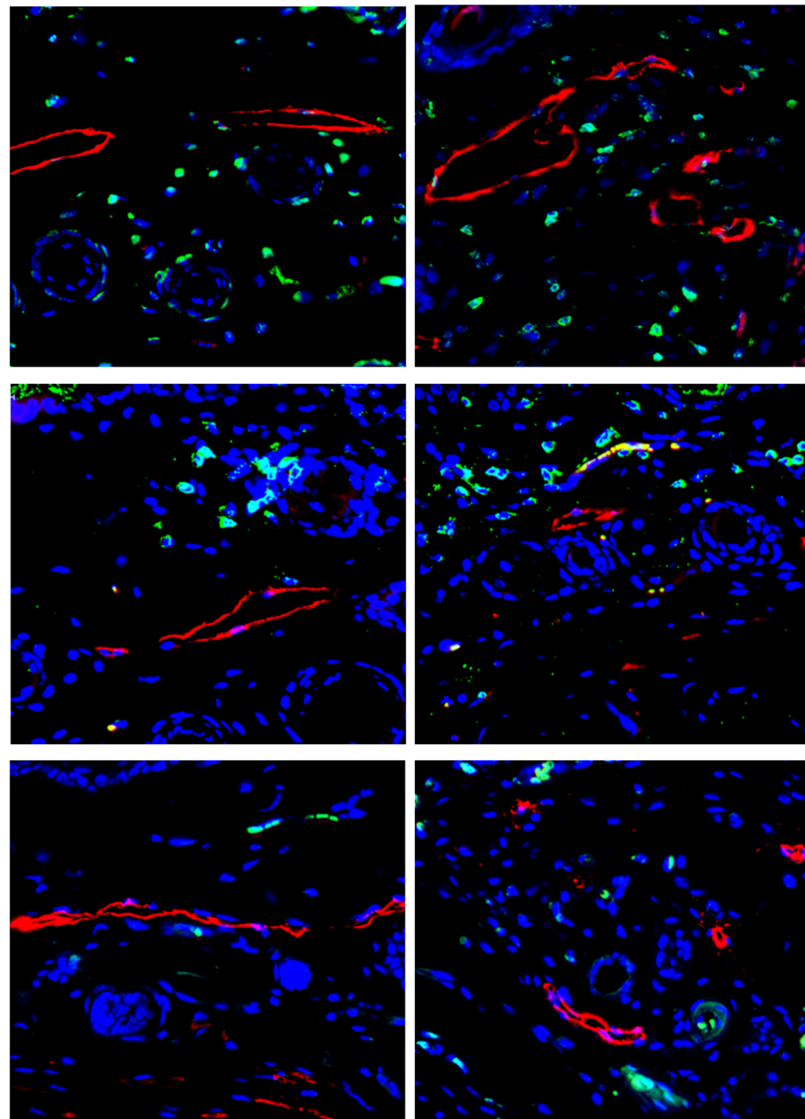

Supplement: NIHMS1504099-supplement-SDC_3.pdf [file NIHMS1504099-supplement-SDC_3.pdf]
