# Supplementary material
Source: PubMed Central journal article supplement (PMC6311716)

Pre-surgery

WT

Prox1<sup>+/-</sup>

Post-surgery

WT

Prox1<sup>+/-</sup>

iNOS LYVE-1 DAPI

Ipsilateral hindlimb skin

50  $\mu$ m

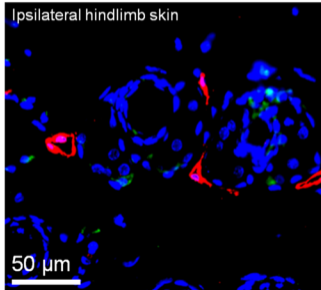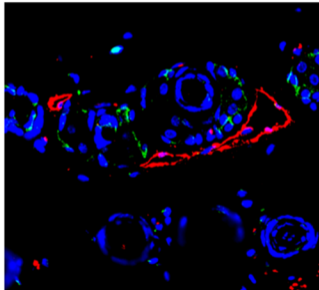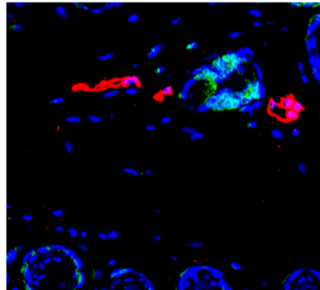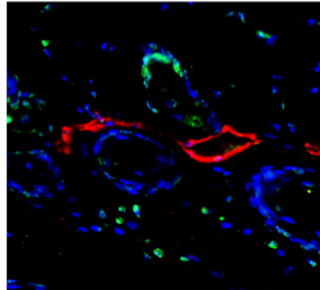

Supplement: NIHMS1504099-supplement-SDC_4.pdf [file NIHMS1504099-supplement-SDC_4.pdf]
