# Supplementary material
Source: PubMed Central journal article supplement (PMC6311716)

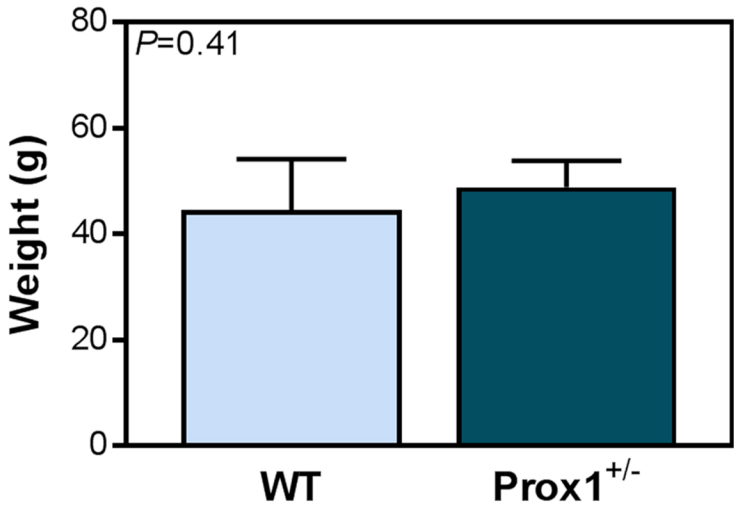

Supplement: NIHMS1504099-supplement-SDC_1.pdf [file NIHMS1504099-supplement-SDC_1.pdf]

**WT**

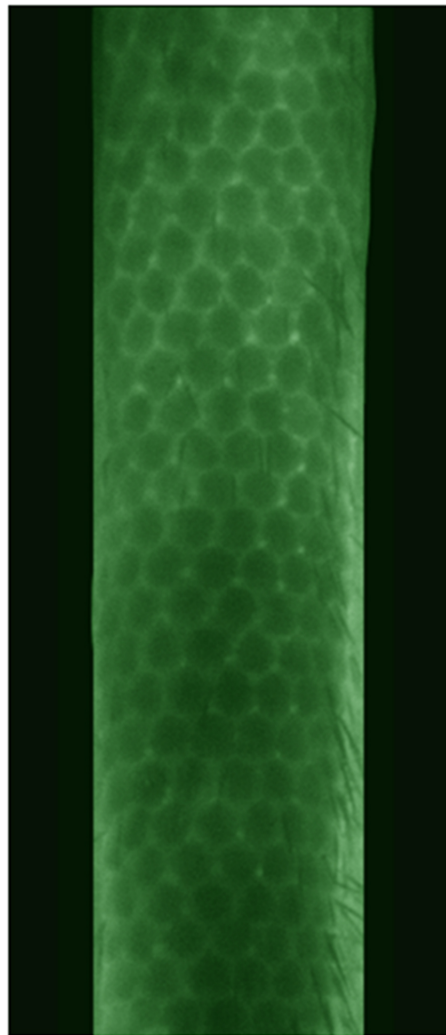

**Prox1<sup>+/-</sup>**

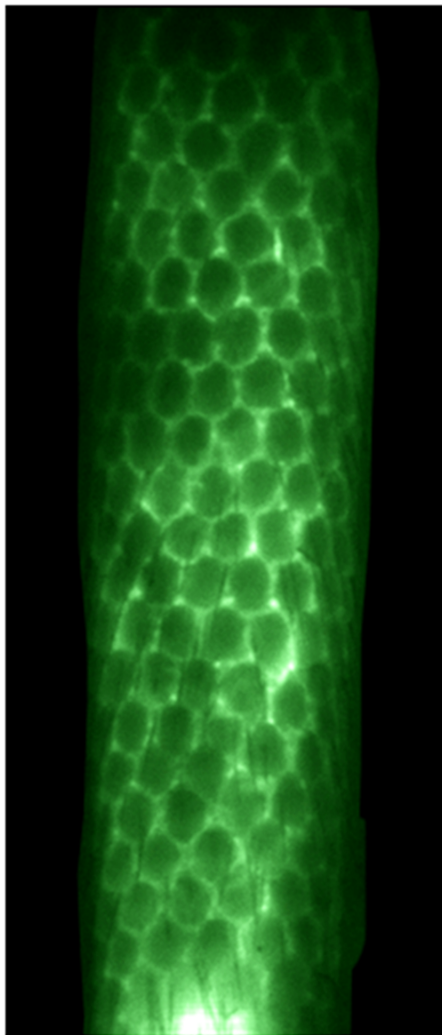

Supplement: NIHMS1504099-supplement-SDC_2.pdf [file NIHMS1504099-supplement-SDC_2.pdf]

Pre-surgery

WT

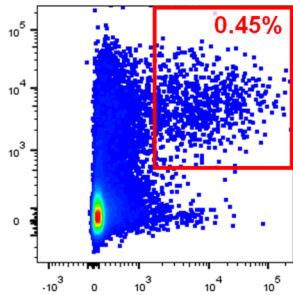

Prox1<sup>+/-</sup>

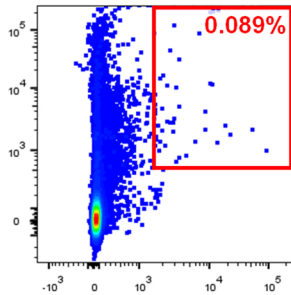

Post-surgery

WT

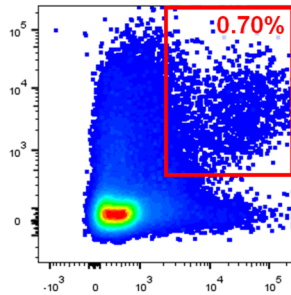

Prox1<sup>+/-</sup>

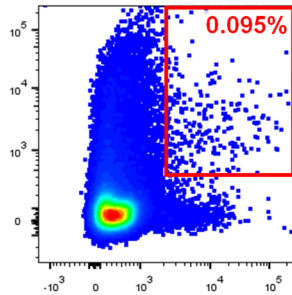

CD11c

FITC

Supplement: NIHMS1504099-supplement-SDC_5.pdf [file NIHMS1504099-supplement-SDC_5.pdf]
